# Supplementary figures and images for: Lupus serum induces inflammatory interaction with neutrophils in human glomerular endothelial cells
Source: HighWire-hosted journal article supplement (doi:10.1136/lupus-2020-000418), 2020-10-01

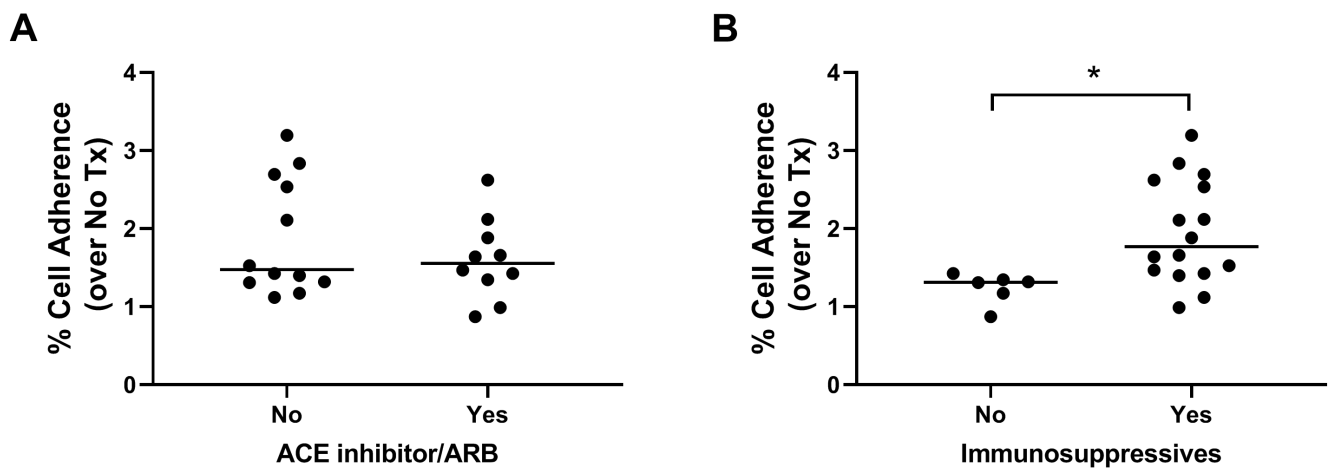

Supplement: lupus-2020-000418supp008_data_supplement.pdf [file lupus-2020-000418supp008_data_supplement.pdf]
